# Supplementary material for: cis-Aconitic Acid Derived from Clostridium sporogenes Attenuates Colitis via Targeting of Neutrophil TREM1
Source: Research Square preprint supplement (doi:10.21203/rs.3.rs-8269242/v1), 2025-12-16
Supplement: Supplementary file 2 [file 9f45f67f1f0df4d1e3a9c98f.docx]

**
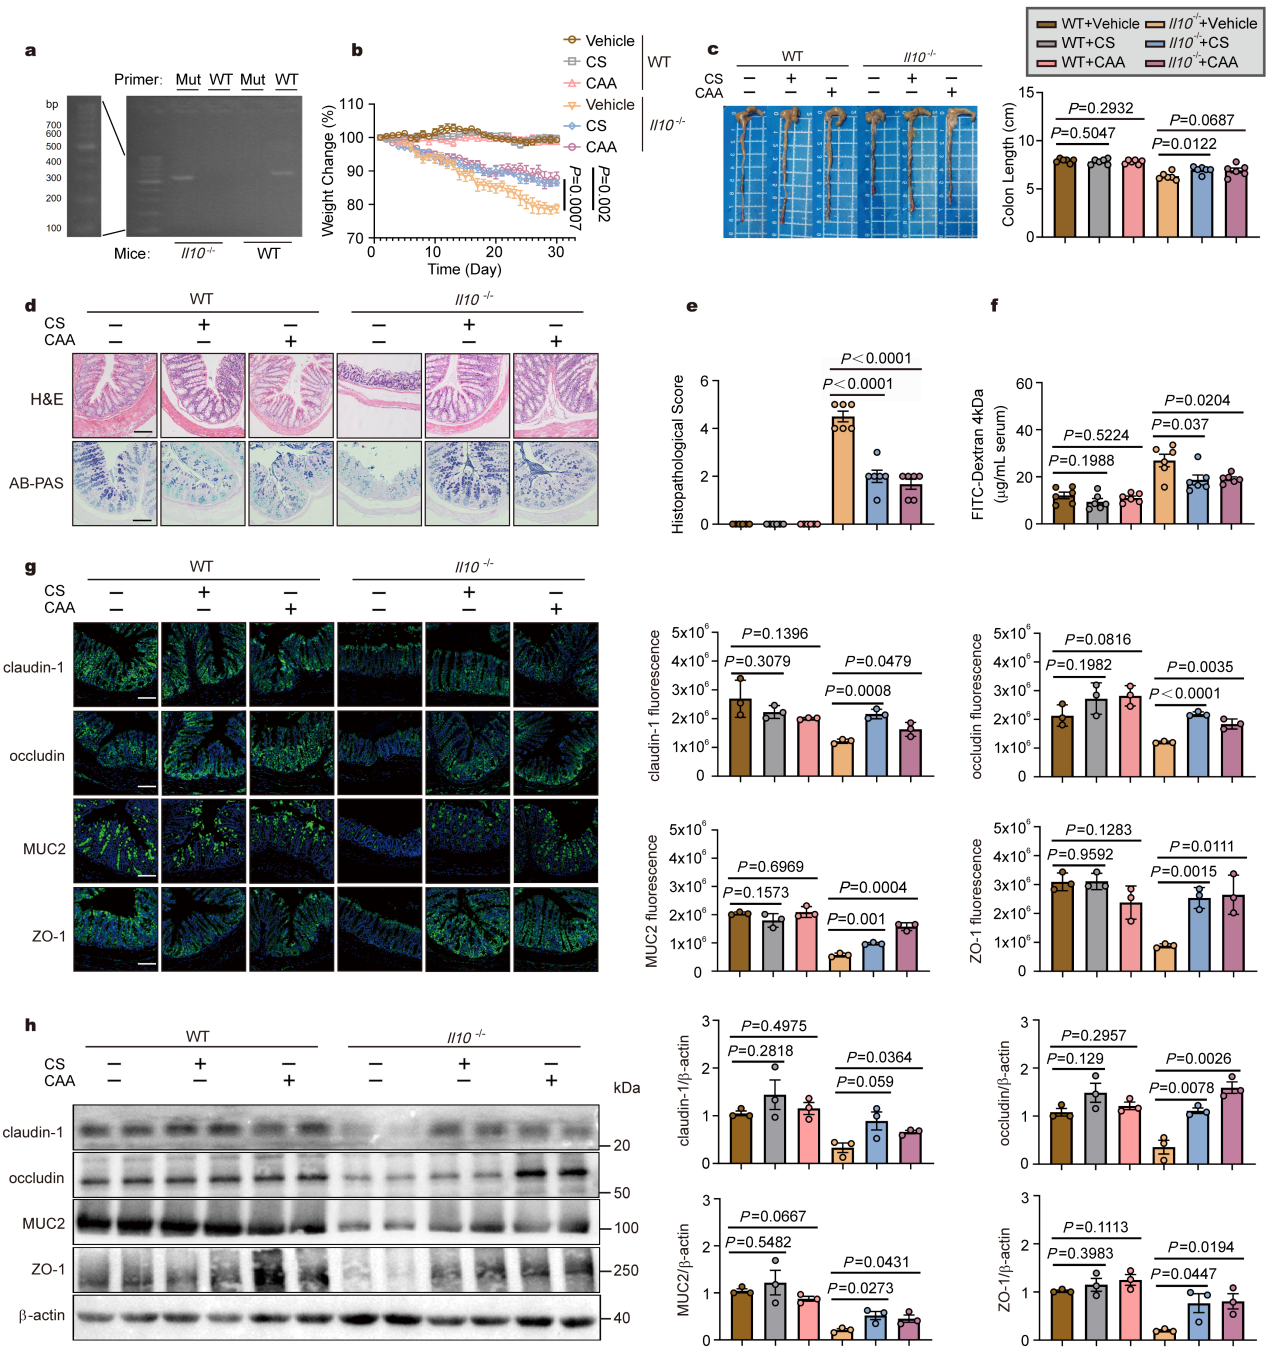
**

**Extended Data Fig.1:Both *C. sporogenes* and its metabolite CAA can ameliorate spontaneous colitis in *Il10*-/- mice.**

**a,** Genotyping of *Il10*-/- and WTmice by using Mut and WT primers. The expected lengths of polymerase chain reaction products are shown in the representative gel.

**b-h,** The *Il10*-/- mice (n = 6/group) were fed with either live *C. sporogenes* (CS, 10⁸CFU/mL, 150μL) or CAA (20mg/kg) for 4 weeks. Colon tissues were isolated on the last day of the experiment.

**b,** Longitudinal monitoring of body weight changes expressed as percentage baseline (n = 6/group).

**c-e, g, h,** Colon tissues were isolated on the last day of the experiment.

**c,** Representative macroscopic images of colon tissue from each group are provided, and the colon length was recorded (n = 6/group).

**d, e,** Histopathological evaluation of colon sections by H&E and AB-PAS staining (scale bar = 100 μm). Histopathological scores of the *Il10-/-* spontaneous colitis were evaluated (n = 6/group).

**f,** Intestinal permeability assessment via FITC-dextran (4 kDa) concentration (μg/mL) in mice serum (n = 6/group).

**g,** The localization of claudin-1, occludin, mucin 2 (MUC2), and zonula occludens-1 (ZO-1) in colon of mice was determined on the last day of the experiment by immunofluorescence staining. Scale bar = 100 μm (n = 3).

**h,** The level of claudin-1, occludin, MUC2 and ZO-1 in the colon of mice was assessed by western blot analysis (n = 3). β-actin was used as a loading control.

Data are presented as the mean ± s.e.m. Statistical significance was determined by

two-sided unpaired t-test.


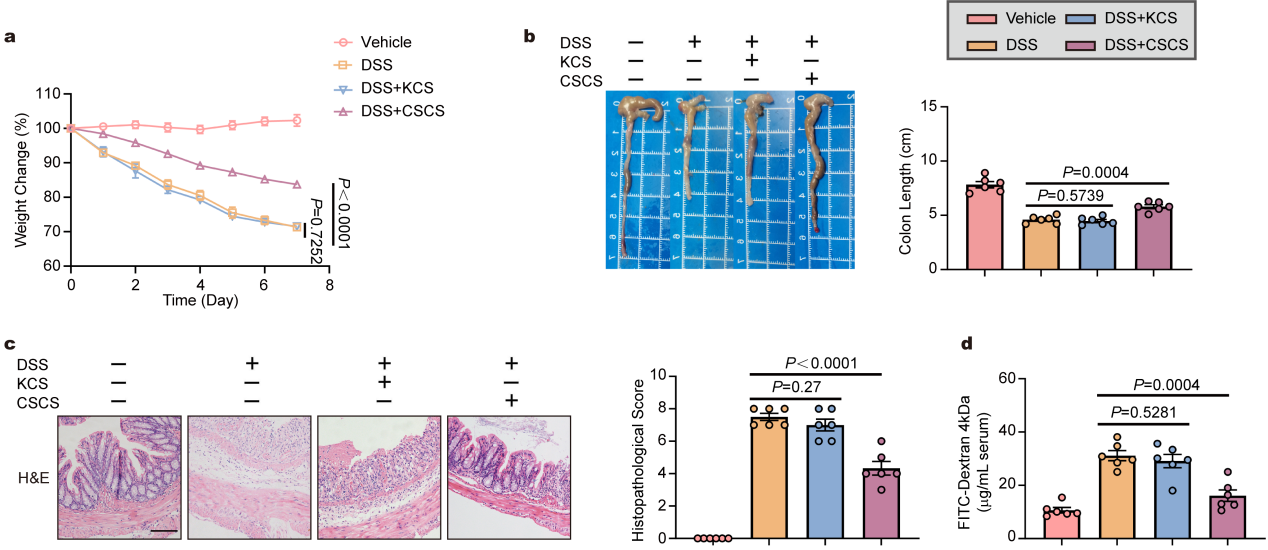


**Extended Data Fig.2:*C. sporogenes* culture supernatant can ameliorate DSS-induced colitis in mice.**

**a-d,** Male C57BL/6J mice (n = 6/group) received 3% DSS in drinking water accompanied by daily oral gavage with eitherheat-killed *C. sporogenes* (KCS) or live *C. sporogenes* culture supernatant (CSCS) control for 7 days.

**a,** Longitudinal monitoring of body weight changes expressed as percentage baseline (n = 6/group).

**b, c,** Colon tissues were isolated on the last day of the experiment.

**b,** Representative macroscopic images of colon tissue from each group is provided, and the colon length was recorded (n = 6/group).

**c,** Histopathological evaluation of colon sections by H&E staining (scale bar = 100 μm). Histopathological scores of the DSS-induced colitis were evaluated (n = 6/group).

**d,** Intestinal permeability assessment via FITC-dextran (4 kDa) concentration (μg/mL) in mice serum (n = 6/group).

Data are presented as the mean ± s.e.m. Statistical significance was determined by

two-sided unpaired t-test.


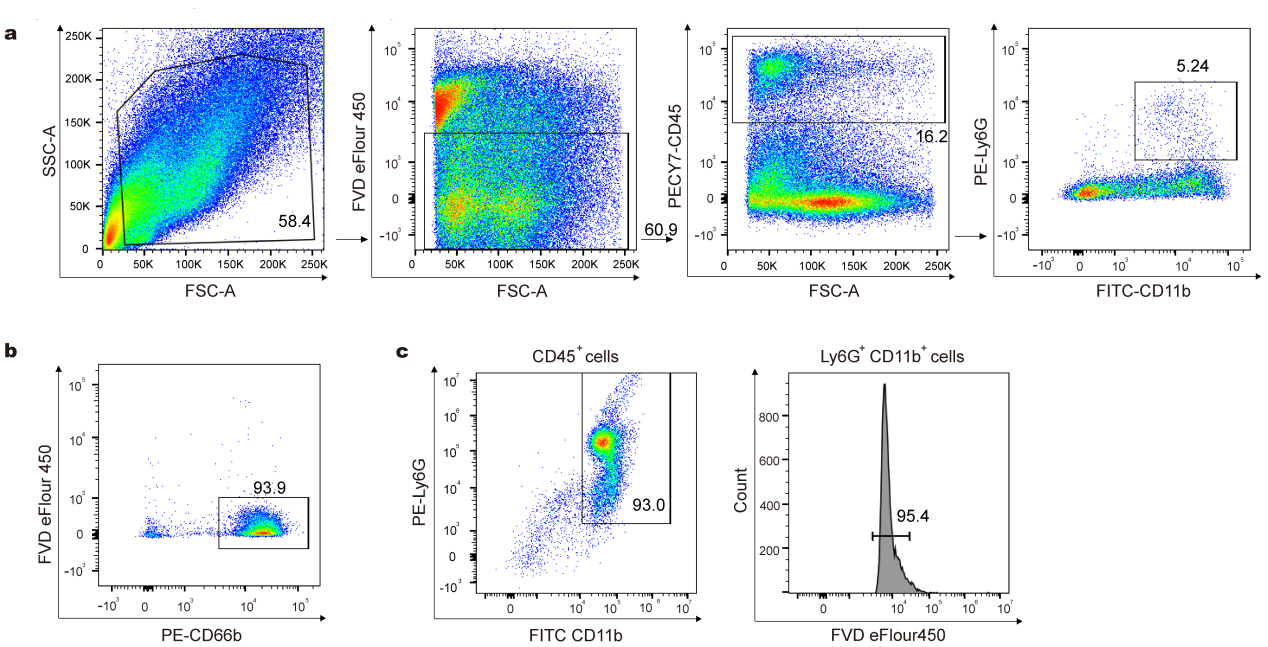


**Extended Data Fig.3:Methodological validation of neutrophil gating strategy and isolation purity.**

**a,** The gating strategy for neutrophils in colon of mice (flow cytometry).

**b,** The purity of isolated peripheral neutrophils. Peripheral neutrophils were isolated from anticoagulated whole blood with Ficoll-Paque gradient centrifugation. After hypotonic lysis of red blood cells, total cells were purified using magnetic beads sorting. Flow cytometry were used for analysis of the purity and livability of neutrophils (≥ 90%).

**c,** The purity of isolated BMDNs (Bone marrow derived neutrophils). BMDNs were isolated from femurs and tibias of mice following standard bone marrow extraction protocols. Cells were further purified using immunomagnetic negative selection with a neutrophil isolation kit. Purity (>90% Ly6G+CD11b+) and viability (>90%) were quantified by flow cytometry.


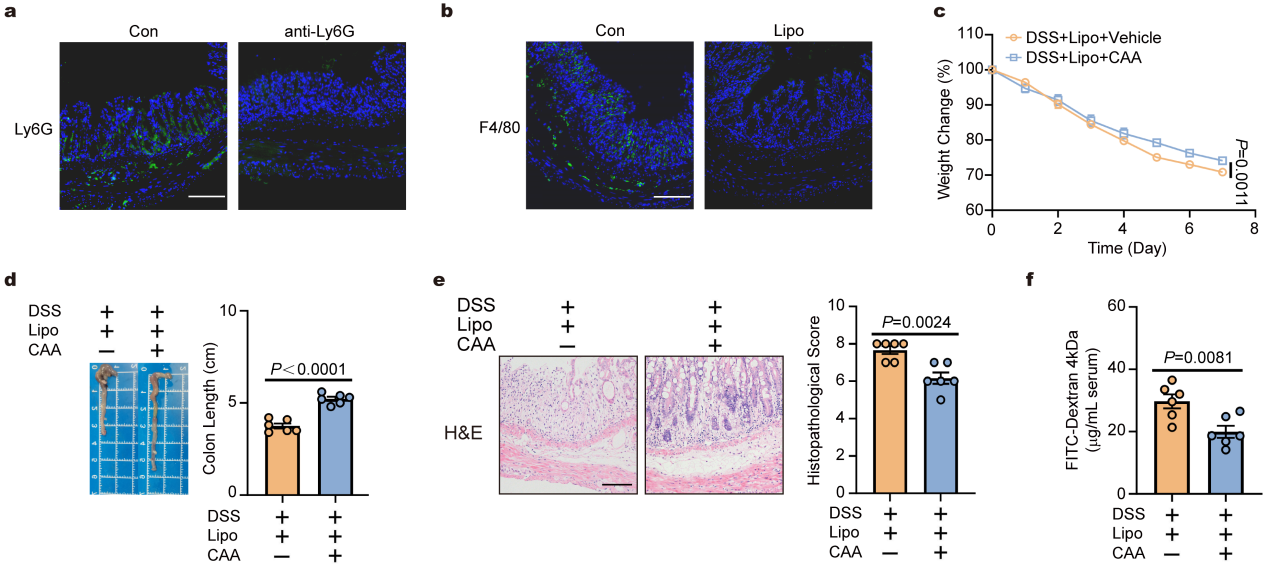


**Extended Data Fig.4:CAA does not require macrophages to exert its therapeutic effects on colitis.**

**a,** Representative immunofluorescence images of colon sections stained for Ly6G (green) from mice treated with isotype control antibody (Con) or anti-mouse Ly6G antibody (anti-Ly6G) (scale bars: 100 μm).

**b,** Representative immunofluorescence images of colon sections stained for F4/80 (red) from mice treated with control liposomes (Con) or clodronate liposomes (Lipo) (scale bars: 100 μm).

**c-f,** Male C57BL/6J mice received 3.0% DSS in drinking water for 7 days. To deplete macrophages, mice were intraperitoneally injected with Lipo one day before and on days 1, 3, and 5 of DSS treatment. During the 7-day period, mice were divided into two groups: one group received only the macrophage depletion treatments (DSS + Lipo), while the other group additionally received daily oral gavage with CAA (20 mg/kg) (DSS + Lipo + CAA).

**c,** Longitudinal monitoring of body weight changes expressed as percentage baseline (n = 6/group).

**d, e,** Colon tissues were isolated on the last day of the experiment.

**d,** Representative macroscopic images of colon tissue from each group are provided, and the colon length was recorded (n = 6/group).

**e,** Histopathological evaluation of colon sections by H&E staining (scale bar = 100 μm). Histopathological scores of the DSS-induced colitis were evaluated (n = 6/group).

**f,** Intestinal permeability assessment via FITC-dextran (4 kDa) concentration (μg/mL) in mice serum (n = 6/group).

Data are presented as the mean ± s.e.m. Statistical significance was determined by

two-sided unpaired t-test.


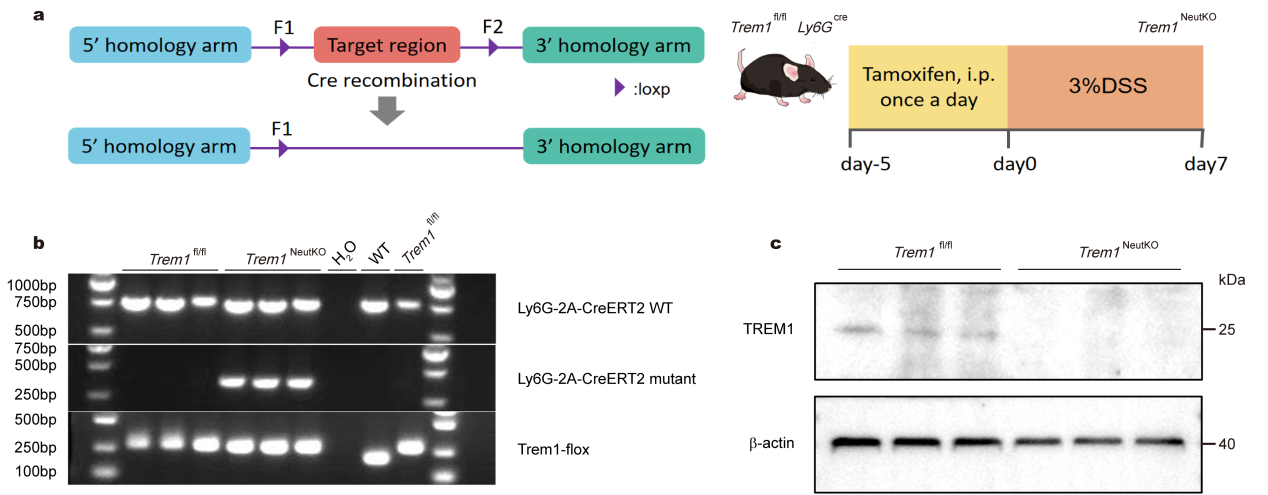


**Extended Data Fig.5:Validation of neutrophil-specific *Trem1* deletion in *Trem1*NeutKO mice**.

**a,** Strategy for the generation of *Trem1*NeutKO mice.

**b,** Genotyping of *Trem1*NeutKO and *Trem1*fl/fl mice by using Ly6G-2A-CreERT2 WT, Ly6G-2A-CreERT2 mutant and *Trem*-flox primers. The expected lengths of polymerase chain reaction products are shown in the representative gel.

**c,** Western blot analysis of TREM1 expression in Ly6G+ neutrophils isolated from colonic lamina propria of *Trem1*NeutKO and *Trem1*fl/fl mice. β-actinwas used as a loading control (n=3).


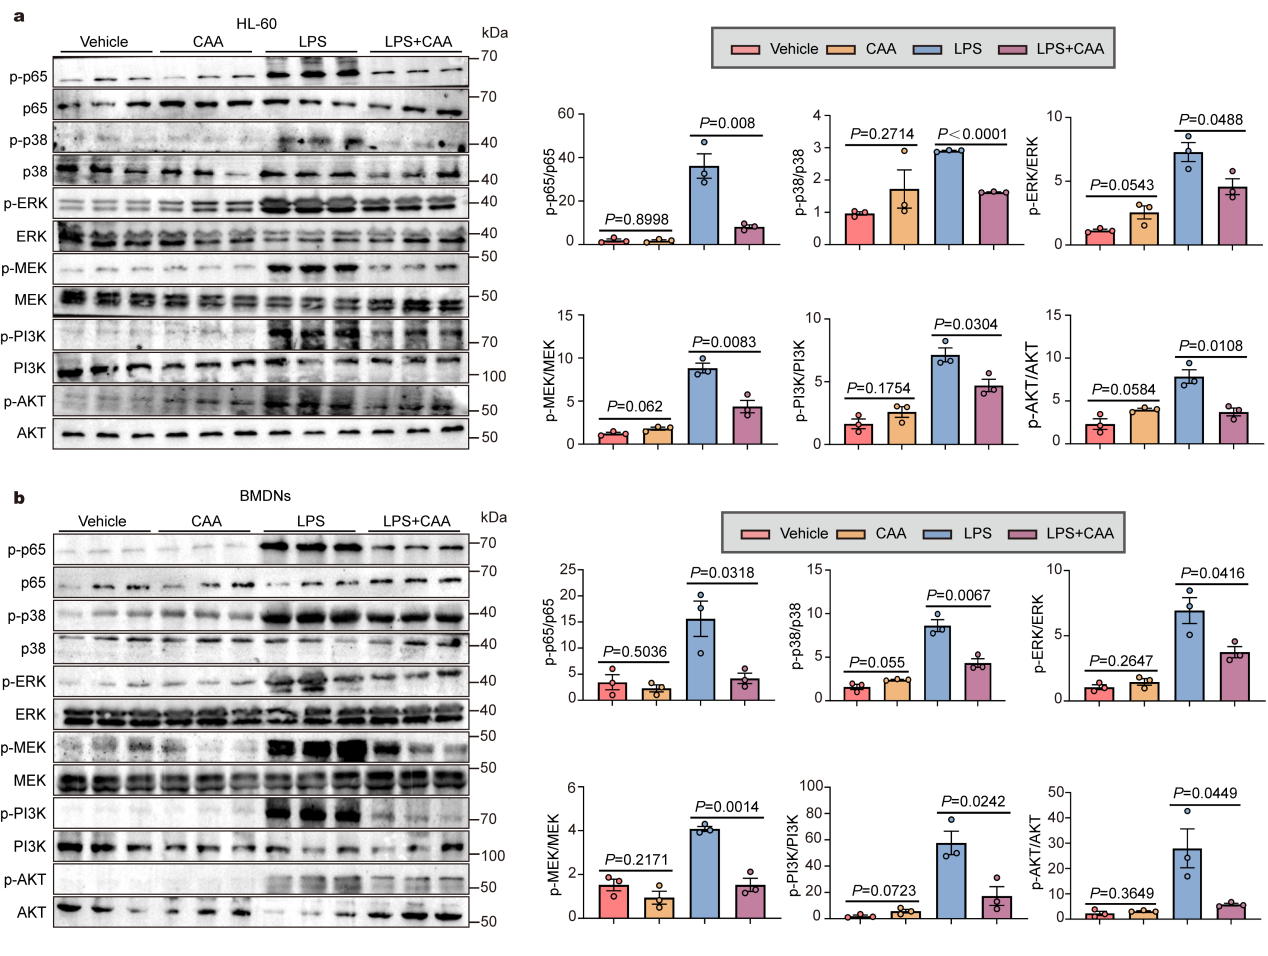


**Extended Data Fig.6:CAA inhibits phosphorylation of TREM1 downstream effectors in HL-60 cells and BMDNs.**

**a,** Western blot analysis of LPS-induced phosphorylation (10 μg/mL, 24 h) in HL-60 cells of TREM1 downstream effectors (p-p38/p65/ERK/MEK/Akt/PI3K) ± CAA (100 μM). Total proteins served as loading controls (n = 3).

**b,** Western blot analysis of LPS-induced phosphorylation (10 μg/mL, 24 h) in mice primary bone marrow-derived neutrophils (BMDNs) of TREM1 downstream effectors (p-p38/p65/ERK/MEK/Akt/PI3K) ± CAA (100 μM). Total proteins served as loading controls (n = 3).

Data are presented as the mean ± s.e.m. Statistical significance was determined by two-sided unpaired t-test.


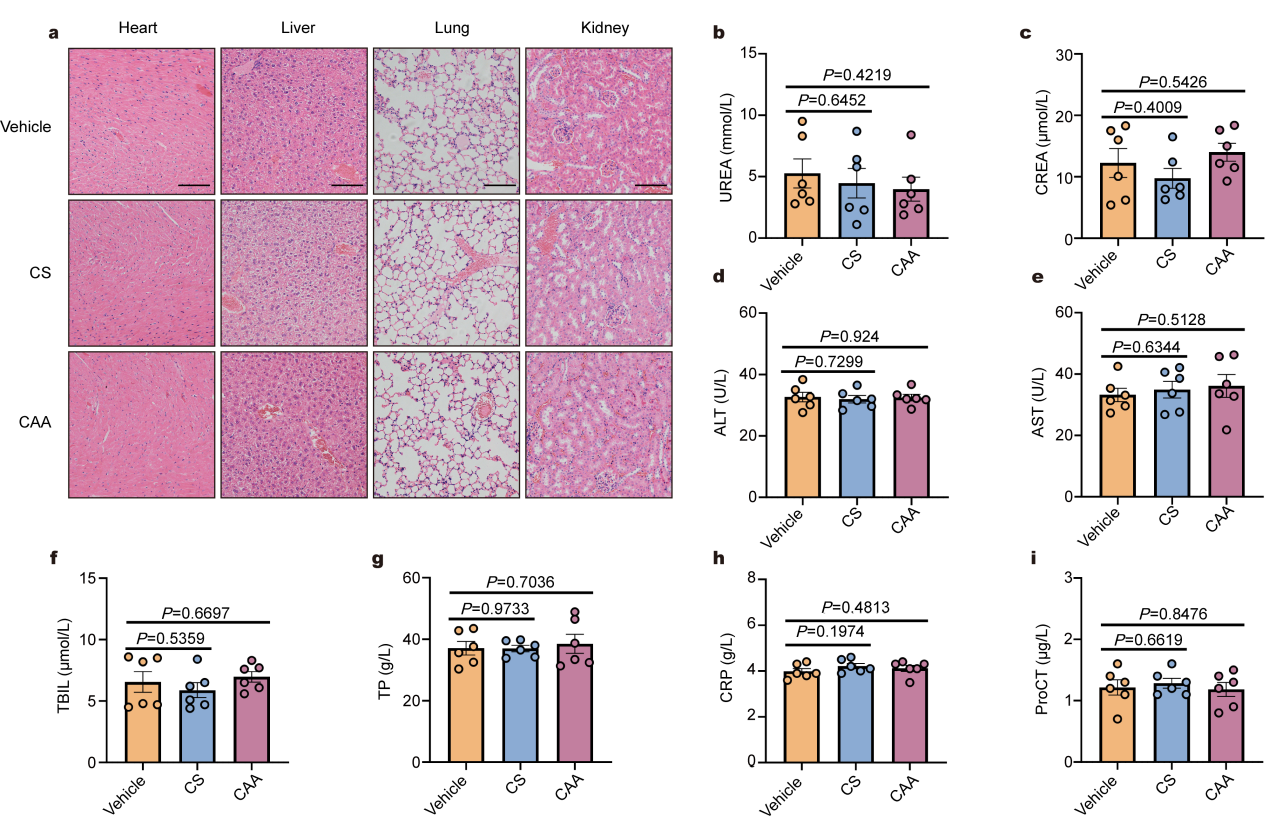


**Extended Data Fig.7:Safety profile of *C. sporogenes* and CAA administration in mice**.

**a-i,** Mice were pretreated with either *C. sporogenes* (CS, 108CFU/mL,150μL) or CAA (20 mg/kg) for 7 days (once a day) and sacrificed for plasma and organ collection.

**a,** Representative H&E staining images for heart, liver, lung, and kidney (Scale bar: 100 μm, n = 6/group).

**b-i.** The plasma levels of alanine aminotransferase urea (UREA), creatinine (CREA), (ALT), aspartate aminotransferase (AST), total bilirubin (TBIL) , total protein (TP), C-reactive protein (CRP) and procalcitonin (ProCT) (n = 6/group).

Data are presented as the mean ± s.e.m. Statistical significance was determined by two-sided unpaired t-test.


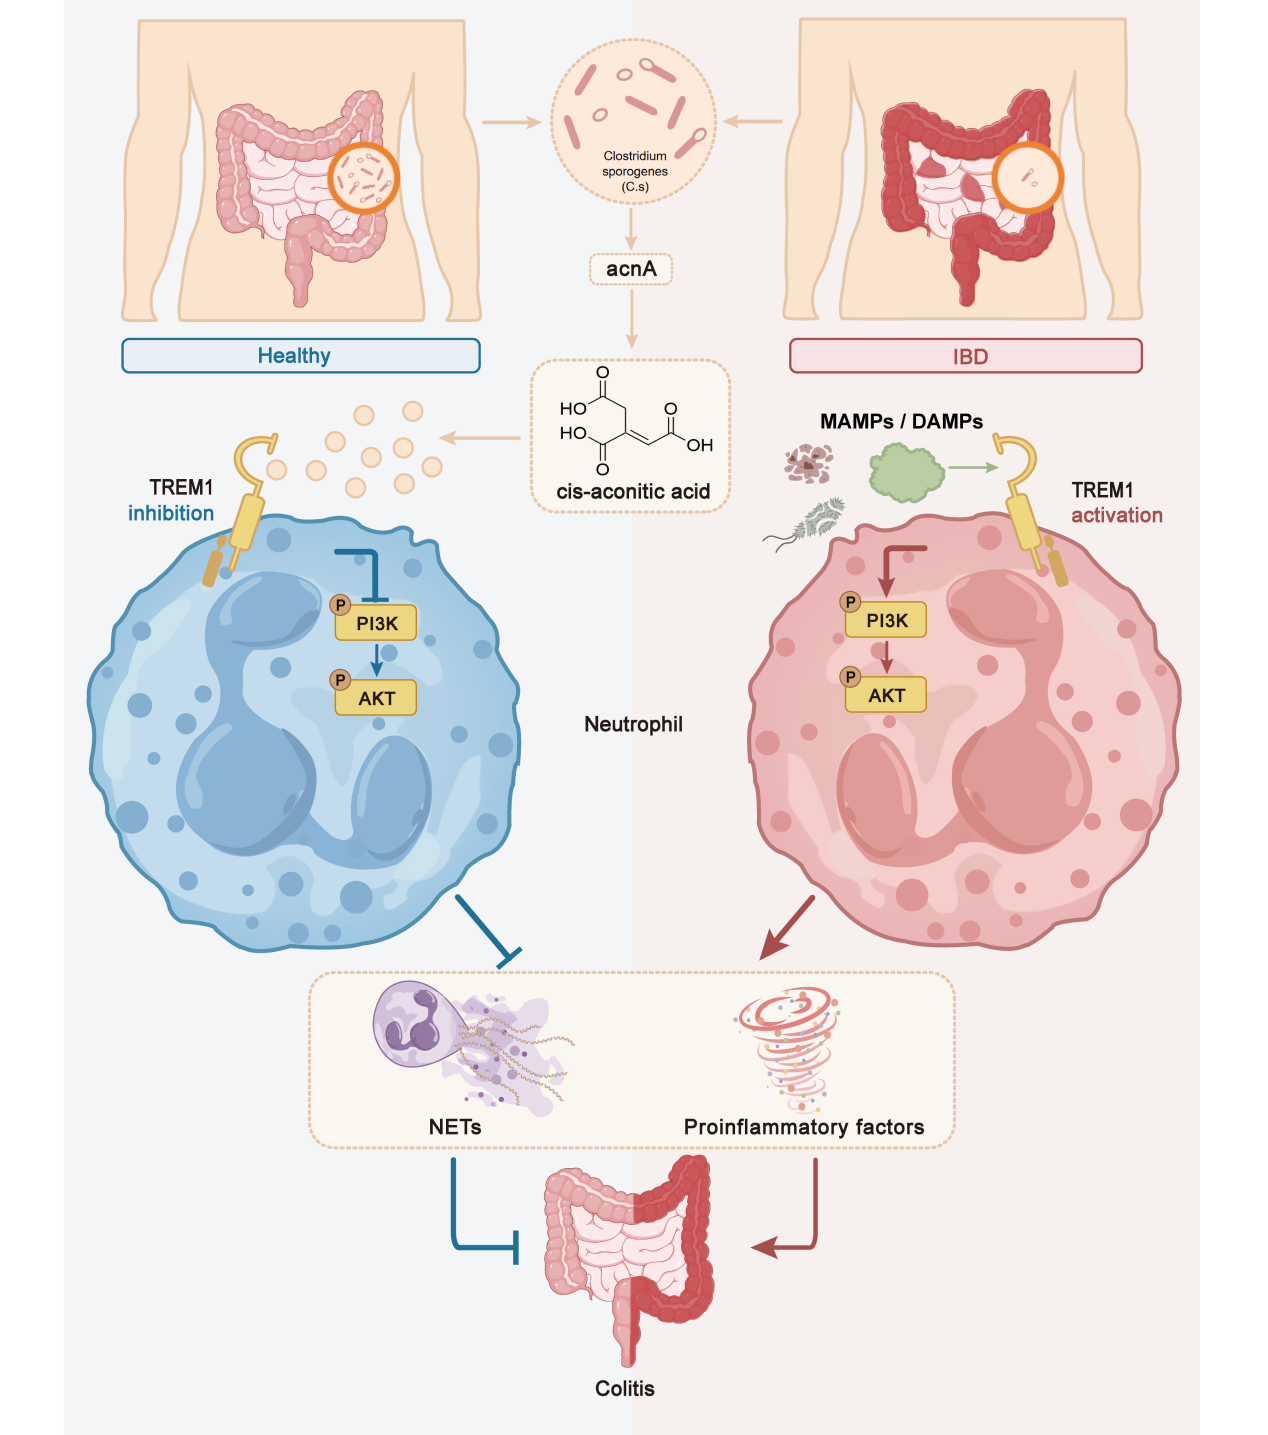


**Extended Data Fig.8:Working model.**

In the healthy gut (left), abundant *C. sporogenes* produces cis-aconitic acid (CAA) via the enzyme aconitate hydratase A (acnA). CAA enters the gut mucosa and directly binds to the TREM1 receptor on lamina propria neutrophils, thereby inhibiting TREM1 activation. This suppression prevents the downstream phosphorylation and activation of the PI3K/AKT signaling cascade. Consequently, the production of pro-inflammatory cytokines and the formation of Neutrophil Extracellular Traps (NETs) are restrained, which collectively alleviates intestinal inflammation. In contrast, in the inflammatory bowel disease (IBD) setting (right), the depletion of *C. sporogenes* leads to a deficiency in CAA. In this CAA-depleted milieu, a plethora of microbial- and damage-associated molecular patterns (MAMPs/DAMPs) potently activate TREM1. The unrestrained TREM1 activation robustly stimulates the PI3K/AKT pathway, evident through increased phosphorylation of PI3K and AKT. This signaling activation subsequently drives the exaggerated release of pro-inflammatory cytokines and promotes excessive NETosis, processes that ultimately exacerbate colitis. Thus, intervention with *C. sporogenes* or its metabolite CAA protects against colitis by directly targeting and suppressing the neutrophil TREM1-PI3K-AKT inflammatory axis.
