# Supplementary figures and images for: cis-Aconitic Acid Derived from Clostridium sporogenes Attenuates Colitis via Targeting of Neutrophil TREM1
Source: Research Square preprint supplement (doi:10.21203/rs.3.rs-8269242/v1), 2025-12-16

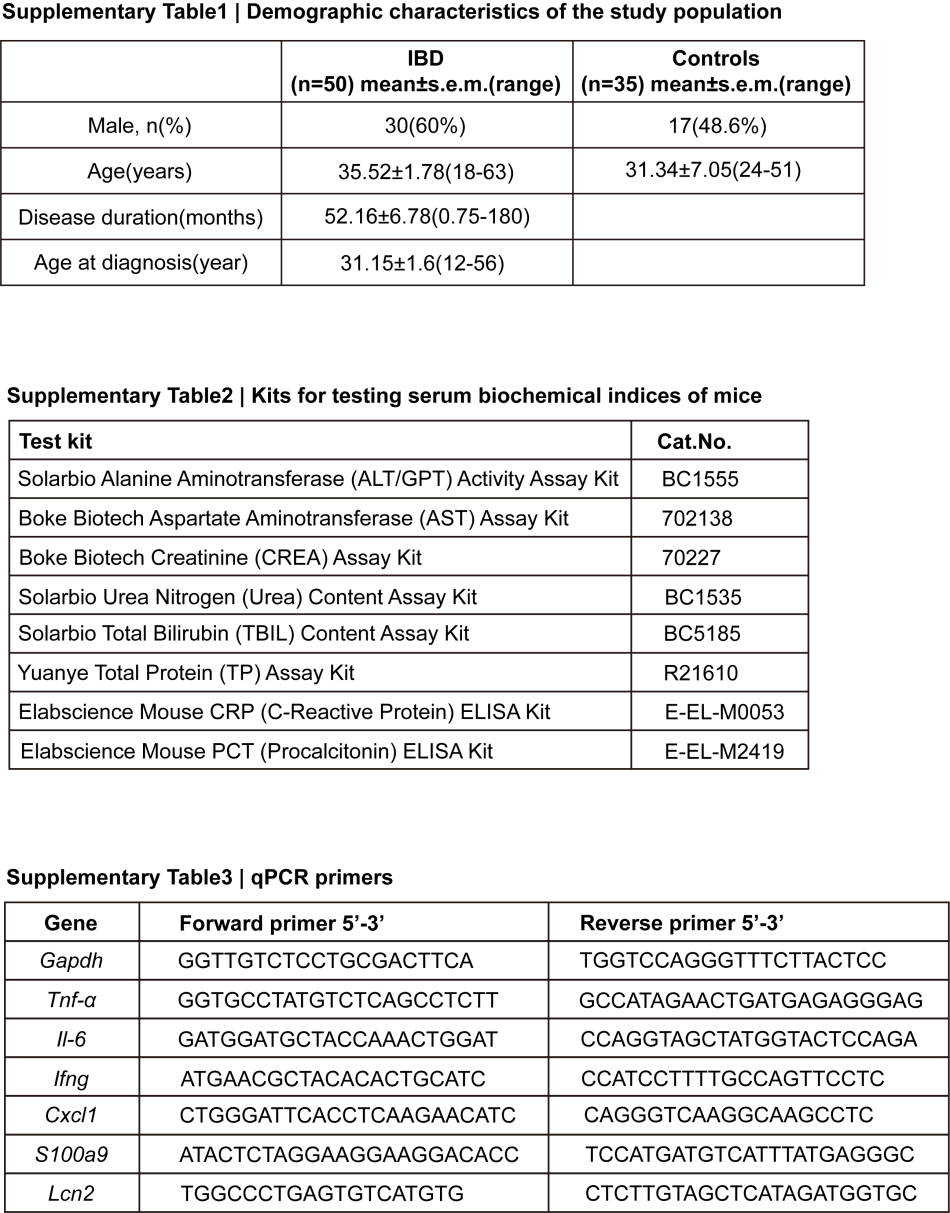

Supplement: Supplementary file 1 [file 634e6ce265756e51a5b56ad3.docx]
